# Supplementary material for: The origin of eukaryotes and rise in complexity were synchronous with the rise in oxygen
Source: Front Bioinform. 2023 Sep 1;3:1233281. doi: 10.3389/fbinf.2023.1233281 (PMC10505794; doi:10.3389/fbinf.2023.1233281)
Supplement: Supplementary file 1 [file Table2.xlsx]

## Sheet: Table S2 - Bact cal min sources
All source divergence times used to construct literature consensus calibrations for the minimal calibration scheme applied to the tree of bacterial-origin proteins. Times from TT5 database, with search terms provided. Justification provided for quarantined studies.v
LUCA	Search: any Bacteria+Archaea
Time	Title	Reference	Year	Included in ranges	Reason for quarantine
2520	The age of the common ancestor of eukaryotes and prokaryotes: statistical inferences.	Gu et al.	1997	No	Does not cover LUCA
3784	Determining divergence times with a protein clock: update and reevaluation.	Feng et al.	1997	No	Pre-2000
1840	A genomic timescale for the origin of eukaryotes.	Hedges et al.	2001	No	Does not cover LUCA
3036	Estimation of divergence times from multiprotein sequences for a few mammalian species and several distantly related organisms.	Nei et al.	2001	No	Does not cover LUCA		avg	4250.2
4290	Estimated minimal divergence times of the major bacterial and archaeal phyla	Sheridan et al.	2003	Yes			sd	32.4152
4250	A major clade of prokaryotes with ancient adaptations to life on land.	Battistuzzi et al.	2009	Yes			se	18.7149
4200	The TimeTree of Life	Hedges et al.	2009	No	Not an original time (review paper)		ci-	4194.06
1983.6	Ancient origins determine global biogeography of hot and cold desert cyanobacteria.	Bahl et al.	2011	No	Does not cover LUCA		ci+	4306.34
Proteobacteria+Eukaryota (ingroup)	Search in TT5: Rhizobium+Vibrio
Time	Title	Reference	Year	Included in ranges	Reason for quarantine
2508	A genomic timescale of prokaryote evolution: insights into the origin of methanogenesis, phototrophy, and the colonization of land.	Battistuzzi et al.	2004	Yes
2360	Estimated minimal divergence times of the major bacterial and archaeal phyla	Sheridan et al.	2005	Yes			avg	2436.4
2373.6	A major clade of prokaryotes with ancient adaptations to life on land.	Battistuzzi et al.	2009	Yes			sd	69.7802
2504	Eubacteria	Battistuzzi et al.	2009	Yes			se	34.8901
2504	The TimeTree of Life	Hedges et al.	2009	No	redundant to Battistuzzi et al.		ci+	2541.07
606.7	Estimating Divergence Times and Substitution Rates in Rhizobia.	Chriki-Adeeb et al.	2016	No	Lack of rigor		ci-	2331.73
Eukaryota crown	Search in TT5: Human+Arabidopsis
Time	Title	Reference	Year	Included in ranges	Reason for quarantine
1100	An estimate of divergence time of Parazoa and Eumetazoa and that of Cephalochordata and Vertebrata by aldolase and triose phosphate isomerase clocks.	Nikoh et al.	1997	No	Pre-2000
1215	Determining divergence times with a protein clock: update and reevaluation.	Feng et al.	1997	No	Pre-2000
1334	Early evolution of the bilateria.	Hausdorf et al.	2000	Yes
1392	Estimation of divergence times from multiprotein sequences for a few mammalian species and several distantly related organisms.	Nei et al.	2001	Yes
1600	Molecular evidence for the early colonization of land by fungi and plants.	Heckman et al.	2001	Yes			avg	1469.53
1530	Molecular clocks do not support the Cambrian explosion.	Blair et al.	2005	Yes			sd	150.053
1671	Evolutionary sequence analysis of complete eukaryote genomes.	Blair et al.	2005	Yes			se	56.7148
1547	Divergence time estimates for the early history of animal phyla and the origin of plants, animals and fungi	Wang et al.	2006	Yes			ci+	1639.67
1212.7	Dating the molecular clock in fungi how close are we?	Berbee et al.	2010	Yes			ci-	1299.38
