# Supplementary material for: The origin of eukaryotes and rise in complexity were synchronous with the rise in oxygen
Source: Front Bioinform. 2023 Sep 1;3:1233281. doi: 10.3389/fbinf.2023.1233281 (PMC10505794; doi:10.3389/fbinf.2023.1233281)
Supplement: Supplementary file 2 [file Table3.xlsx]

## Sheet: Table S3 - Arch cal sources
All source divergence times used to construct literature consensus calibrations for the calibration scheme applied to the tree of archaeal-origin proteins. Times from TT5 database, with search terms provided. Justification provided for quarantined studies.
LUCA	Search: any Bacteria+Archaea
Time	Title	Reference	Year	Included in ranges	Reason for quarantine
2520	The age of the common ancestor of eukaryotes and prokaryotes: statistical inferences.	Gu et al.	1997	No	Does not cover LUCA
3784	Determining divergence times with a protein clock: update and reevaluation.	Feng et al.	1997	No	Pre-2000
1840	A genomic timescale for the origin of eukaryotes.	Hedges et al.	2001	No	Does not cover LUCA
3036	Estimation of divergence times from multiprotein sequences for a few mammalian species and several distantly related organisms.	Nei et al.	2001	No	Does not cover LUCA		avg	4250.2
4290	Estimated minimal divergence times of the major bacterial and archaeal phyla	Sheridan et al.	2003	Yes			sd	32.4152
4250	A major clade of prokaryotes with ancient adaptations to life on land.	Battistuzzi et al.	2009	Yes			se	18.7149
4200	The TimeTree of Life	Hedges et al.	2009	No	Not an original time (review paper)		ci-	4194.06
1983.6	Ancient origins determine global biogeography of hot and cold desert cyanobacteria.	Bahl et al.	2011	No	Does not cover LUCA		ci+	4306.34
Older bookend (proteos+campylobacter)	Search: Rickettsia+Campylobacter
Time	Title	Reference	Year	Included in ranges	Reason for quarantine
2800	A genomic timescale of prokaryote evolution: insights into the origin of methanogenesis, phototrophy, and the colonization of land.	Battistuzzi et al.	2004	Yes			avg	2875.6
2849	Eubacteria	Battistuzzi et al.	2009	Yes			sd	63.1859
2880.2	A major clade of prokaryotes with ancient adaptations to life on land.	Battistuzzi et al.	2009	Yes			se	31.593
2849	The TimeTree of Life	Hedges et al.	2009	No	Redundant		ci+	2970.38
2973.2	The Timetree of Prokaryotes: New Insights into Their Evolution and Speciation.	Marin et al.	2016	Yes			ci-	2780.82
Metazoa	Search in TT5: Homo+Amphimedon
Time	Title	Reference	Year	Included in ranges	Reason for quarantine
960	An estimate of divergence time of Parazoa and Eumetazoa and that of Cephalochordata and Vertebrata by aldolase and triose phosphate isomerase clocks.	Nikoh et al.	1997	No	Pre-2000
653	Estimating metazoan divergence times with a molecular clock.	Peterson et al.	2004	No	Conflicts with Turner et al 2021
1355	A molecular timescale of eukaryote evolution and the rise of complex multicellular life.	Hedges et al.	2004	Yes
821.8	A molecular time-scale for eukaryote evolution recalibrated with the continuous microfossil record.	Berney et al.	2006	No	Conflicts with Turner
710	Fossils and phylogenies: integrating multiple lines of evidence to investigate the origin of early major metazoan lineages	Cartwright et al.	2007	No	Conflicts with Turner
705	The Ediacaran emergence of bilaterians: congruence between the genetic and the geological fossil records.	Peterson et al.	2008	No	Conflicts with Turner
1020	The TimeTree of Life	Hedges et al.	2009	Yes			avg	1088.33
710.7	Dating the molecular clock in fungi how close are we?	Berbee et al.	2010	No	Conflicts with Turner		sd	195.888
701.9	Revisiting the age, evolutionary history and species level diversity of the genus Hydra (Cnidaria: Hydrozoa).	Schwentner et al.	2015	No	Conflicts with Turner		se	74.0388
756.6	Ancestral state reconstruction of ontogeny supports a bilaterian affinity for Dickinsonia.	Gold et al.	2015	No	Conflicts with Turner		ci+	1310.45
758.1	Uncertainty in the Timing of Origin of Animals and the Limits of Precision in Molecular Timescales.	dos Reis et al.	2015	No	Conflicts with Turner		ci-	866.217
890	Possible poriferan body fossils in early neoproterozoic microbial reefs	Turner, E	2021	Yes
		v
