# Supplementary material for: The origin of eukaryotes and rise in complexity were synchronous with the rise in oxygen
Source: Front Bioinform. 2023 Sep 1;3:1233281. doi: 10.3389/fbinf.2023.1233281 (PMC10505794; doi:10.3389/fbinf.2023.1233281)
Supplement: Supplementary file 3 [file Table4.xlsx]

## Sheet: Table S4 - inferred times
Inferred times of all phylogenetic nodes considered in the construction of the eukaryogenesis interval
LACA-K
Phylogeny used	Younger Time	Older Time	Point Estimate	Note
Bacterial-origin proteins (minimal calibrations)	NA	NA	NA	Not present in phylogenies of bacterial-origin proteins
Bacterial-origin proteins (full calibrations)	NA	NA	NA	Not present in phylogenies of bacterial-origin proteins
Archaeal-origin proteins	-2.38683	-2.74145	-2.582
LBCA-K
Reference	Younger Time	Older Time	Point Estimate	Note
Bacterial-origin proteins (minimal calibrations)	-1.88872	-2.18992	-2.04268
Bacterial-origin proteins (full calibrations)	-2.09311	-2.18012	-2.1501
Archaeal-origin proteins	NA	NA	NA	Not present in phylogenies of archaeal-origin proteins
Crown Eukaryota
Reference	Younger Time	Older Time	Point Estimate	Note
Bacterial-origin proteins (minimal calibrations)	-1.31642	-1.61085	-1.46246
Bacterial-origin proteins (full calibrations)	-1.57196	-1.63888	-1.60535
Archaeal-origin proteins	-1.45334	-1.7932	-1.64842
