# Supplementary material for: The origin of eukaryotes and rise in complexity were synchronous with the rise in oxygen
Source: Front Bioinform. 2023 Sep 1;3:1233281. doi: 10.3389/fbinf.2023.1233281 (PMC10505794; doi:10.3389/fbinf.2023.1233281)
Supplement: Supplementary file 4 [file Table1.xlsx]

## Sheet: Table S1 - Bact cal max sources
All source divergence times used to construct literature consensus calibrations for the maximal calibration scheme applied to the tree of bacterial-origin proteins. Times from TT5 database, with search terms provided. Justification provided for quarantined studies.
LUCA	Search: any Bacteria+Archaea
Time	Title	Reference	Year	Included in ranges	Reason for quarantine
2520	The age of the common ancestor of eukaryotes and prokaryotes: statistical inferences.	Gu et al.	1997	No	Does not cover LUCA
3784	Determining divergence times with a protein clock: update and reevaluation.	Feng et al.	1997	No	Pre-2000
1840	A genomic timescale for the origin of eukaryotes.	Hedges et al.	2001	No	Does not cover LUCA
3036	Estimation of divergence times from multiprotein sequences for a few mammalian species and several distantly related organisms.	Nei et al.	2001	No	Does not cover LUCA		avg	4250.2
4290	Estimated minimal divergence times of the major bacterial and archaeal phyla	Sheridan et al.	2003	Yes			sd	32.4152
4250	A major clade of prokaryotes with ancient adaptations to life on land.	Battistuzzi et al.	2009	Yes			se	18.7149
4200	The TimeTree of Life	Hedges et al.	2009	No	Not an original time (review paper)		ci-	4194.06
1983.6	Ancient origins determine global biogeography of hot and cold desert cyanobacteria.	Bahl et al.	2011	No	Does not cover LUCA		ci+	4306.34
Terrabacteria (outgroup)	Search in TT5: Actinomyces+Deinococcus						avg	2655.15
Time	Title	Reference	Year	Included in ranges	Reason for quarantine		sd	83.75
2738.9	Eubacteria	Battistuzzi et al.	2009	Yes			se	59.2202
2738.9	The TimeTree of Life	Hedges et al.	2009	No	redundant to Battistuzzi et al.		ci+	2832.81
2571.4	The Timetree of Prokaryotes: New Insights into Their Evolution and Speciation.	Marin et al.	2016	Yes			ci-	2477.49
Proteobacteria+Eukaryota (ingroup)	Search in TT5: Rhizobium+Vibrio
Time	Title	Reference	Year	Included in ranges	Reason for quarantine
2508	A genomic timescale of prokaryote evolution: insights into the origin of methanogenesis, phototrophy, and the colonization of land.	Battistuzzi et al.	2004	Yes
2360	Estimated minimal divergence times of the major bacterial and archaeal phyla	Sheridan et al.	2005	Yes			avg	2436.4
2373.6	A major clade of prokaryotes with ancient adaptations to life on land.	Battistuzzi et al.	2009	Yes			sd	69.7802
2504	Eubacteria	Battistuzzi et al.	2009	Yes			se	34.8901
2504	The TimeTree of Life	Hedges et al.	2009	No	redundant to Battistuzzi et al.		ci+	2541.07
606.7	Estimating Divergence Times and Substitution Rates in Rhizobia.	Chriki-Adeeb et al.	2016	No	Lack of rigor		ci-	2331.73
Beta+Gamma	Search in TT5: Vibrio+Bordetella
Time	Title	Reference	Year	Included in ranges	Reason for quarantine		avg	1887.22
1940	A genomic timescale of prokaryote evolution: insights into the origin of methanogenesis, phototrophy, and the colonization of land.	Battistuzzi et al.	2004	Yes			sd	154.014
1623.1	A major clade of prokaryotes with ancient adaptations to life on land.	Battistuzzi et al.	2009	Yes			se	77.0072
1992.9	Eubacteria	Battistuzzi et al.	2009	Yes			ci+	2118.25
1992.9	The TimeTree of Life	Hedges et al.	2009	No	redundant to Battistuzzi et al.		ci-	1656.2
a-Proteobacteria crown	Search in TT5: Brucella+Rhizobium						avg	589.642
Time	Title	Reference	Year	Included in ranges	Reason for quarantine		sd	3.858
593.5	Eubacteria	Battistuzzi et al.	2009	Yes			se	2.72802
593.5	The TimeTree of Life	Hedges et al.	2009	No	redundant to Battistuzzi et al.		ci+	597.826
585.784	The Timetree of Prokaryotes: New Insights into Their Evolution and Speciation	Marin et al	2016	Yes			ci-	581.458
Eukaryota crown	Search in TT5: Human+Arabidopsis
Time	Title	Reference	Year	Included in ranges	Reason for quarantine
1100	An estimate of divergence time of Parazoa and Eumetazoa and that of Cephalochordata and Vertebrata by aldolase and triose phosphate isomerase clocks.	Nikoh et al.	1997	No	Pre-2000
1215	Determining divergence times with a protein clock: update and reevaluation.	Feng et al.	1997	No	Pre-2000
1334	Early evolution of the bilateria.	Hausdorf et al.	2000	Yes
1392	Estimation of divergence times from multiprotein sequences for a few mammalian species and several distantly related organisms.	Nei et al.	2001	Yes
1600	Molecular evidence for the early colonization of land by fungi and plants.	Heckman et al.	2001	Yes			avg	1469.53
1530	Molecular clocks do not support the Cambrian explosion.	Blair et al.	2005	Yes			sd	150.053
1671	Evolutionary sequence analysis of complete eukaryote genomes.	Blair et al.	2005	Yes			se	56.7148
1547	Divergence time estimates for the early history of animal phyla and the origin of plants, animals and fungi	Wang et al.	2006	Yes			ci+	1639.67
1212.7	Dating the molecular clock in fungi how close are we?	Berbee et al.	2010	Yes			ci-	1299.38
Opisthokonta crown	Search in TT5: Human+Saccharomyces cerevisiae
Time	Title	Reference	Year	Included in ranges	Reason for quarantine
1272	Determining divergence times with a protein clock: update and reevaluation.	Feng et al.	1997	No	Pre-2000
1392	Estimation of divergence times from multiprotein sequences for a few mammalian species and several distantly related organisms.	Nei et al.	2001	Yes
1600	Molecular evidence for the early colonization of land by fungi and plants.	Heckman et al.	2001	Yes
984	The timing of eukaryotic evolution: does a relaxed molecular clock reconcile proteins and fossils?	Douzery et al.	2004	Yes
1547	A molecular timescale of eukaryote evolution and the rise of complex multicellular life.	Hedges et al.	2004	Yes
1398	Evolutionary sequence analysis of complete eukaryote genomes.	Blair et al.	2005	Yes
959.8	A molecular time-scale for eukaryote evolution recalibrated with the continuous microfossil record.	Berney et al.	2006	Yes
1150	Molecular taxonomy, origins and evolution of freshwater ascomycetes	Vijaykrishna et al.	2006	Yes
1538	Divergence time estimates for the early history of animal phyla and the origin of plants, animals and fungi	Wang et al.	2006	Yes
985	The Ediacaran emergence of bilaterians: congruence between the genetic and the geological fossil records.	Peterson et al.	2008	Yes
1368	The TimeTree of Life	Hedges et al.	2009	Yes
973.8	Dating the molecular clock in fungi how close are we?	Berbee et al.	2010	Yes			avg	1230.1
966.1	Rock-inhabiting fungi originated during periods of dry climate in the late Devonian and middle Triassic	Gueidan et al.	2011	Yes			sd	229.913
1295.7	Estimating the timing of early eukaryotic diversification with multigene molecular clocks.	Parfrey et al.	2011	Yes			se	59.3633
1017	The adaptive radiation of lichen-forming Teloschistaceae is associated with sunscreening pigments and a bark-to-rock substrate shift.	Gaya et al.	2015	Yes			ci+	1408.19
1277.1	Ancestral state reconstruction of ontogeny supports a bilaterian affinity for Dickinsonia.	Gold et al.	2015	Yes			ci-	1052.01
Homeothermia	Search in TT5: Human+Gallus
Time	Title	Reference	Year	Included in ranges	Reason for quarantine
326	Molecular phylogeny and divergence times of deuterostome animals.	Blair et al.	2005	Yes
323.6	A mitogenomic timescale for birds detects variable phylogenetic rates of molecular evolution and refutes the standard molecular clock.	Pereira et al.	2006	Yes
315.4	Mitochondrial genomes from major lizard families suggest their phylogenetic relationships and ancient radiations.	Kumazawa et al.	2007	Yes
328	Rapid diversification and dispersal during periods of global warming by plethodontid salamanders.	Vieites et al.	2007	Yes
312	Complete mitochondrial genomes of three neobatrachian anurans: a case study of divergence time estimation using different data and calibration settings.	Igawa et al.	2008	Yes
318	Timing of a mtDNA gene rearrangement and intercontinental dispersal of varanid lizards.	Amer et al.	2008	Yes
316	Molecules, morphology, and ecology indicate a recent, amphibious ancestry for echidnas.	Phillips et al.	2009	Yes
320.3	Nine exceptional radiations plus high turnover explain species diversity in jawed vertebrates.	Alfaro et al.	2009	Yes
321.4	Mitogenomic perspectives into iguanid phylogeny and biogeography: Gondwanan vicariance for the origin of Madagascan oplurines.	Okajima et al.	2009	Yes
324.5	The TimeTree of Life	Hedges et al.	2009	Yes
308.5	Dating the molecular clock in fungi how close are we?	Berbee et al.	2010	Yes
310	Next generation sequencing and analysis of a conserved transcriptome of New Zealand's kiwi.	Subramanian et al.	2010	Yes
314	Evolutionary origin and phylogeny of the modern holocephalans (Chondrichthyes: Chimaeriformes): a mitogenomic perspective.	Inoue et al.	2010	Yes
317.9	A likelihood method for assessing molecular divergence time estimates and the placement of fossil calibrations.	Pyron et al.	2010	Yes
320.7	Identical skin toxins by convergent molecular adaptation in frogs.	Roelants et al.	2010	Yes
322.4	A multilocus timescale for the origin of extant amphibians.	San Mauro et al.	2010	Yes
328.4	Mitochondrial genomes of acrodont lizards: timing of gene rearrangements and phylogenetic and biogeographic implications.	Okajima et al.	2010	Yes
315.9	Impacts of the Cretaceous Terrestrial Revolution and KPg extinction on mammal diversification.	Meredith et al.	2011	Yes
317.4	Multiple genome alignments facilitate development of NPCL markers: a case study of tetrapod phylogeny focusing on the position of turtles.	Shen et al.	2011	Yes
334.7	Estimating the timing of early eukaryotic diversification with multigene molecular clocks.	Parfrey et al.	2011	Yes
174.1	Bioinformatics Analysis of Melanocortin-1 Receptor Gene for Silver Fox and Other Species	Liu et al.	2012	No	fossil record
318.9	The development of three long universal nuclear protein-coding locus markers and their application to osteichthyan phylogenetics with nested PCR.	Shen et al.	2012	Yes
329.1	Vertebrate time-tree elucidates the biogeographic pattern of a major biotic change around the K-T boundary in Madagascar.	Crottini et al.	2012	Yes
315.8	The draft genomes of soft-shell turtle and green sea turtle yield insights into the development and evolution of the turtle-specific body plan.	Wang et al.	2013	Yes
324.7	Uncertainty in the Timing of Origin of Animals and the Limits of Precision in Molecular Timescales.	dos Reis et al.	2015	Yes			avg	319.9
319.3	Phylogenomics reveals rapid, simultaneous diversification of three major clades of Gondwanan frogs at the Cretaceous-Paleogene boundary.	Feng et al.	2017	Yes			sd	6.05027
312.2	A phylogenomic framework and timescale for comparative studies of tunicates.	Delsuc et al.	2018	Yes			se	1.14339
319	What do ossification sequences tell us about the origin of extant amphibians?	Laurin et al.	2018	Yes			ci+	323.33
323.1	Molecular Phylogeny and Dating Reveal a Terrestrial Origin in the Early Carboniferous for Ascaridoid Nematodes.	Li et al.	2018	Yes			ci-	316.47
Metazoa	Search in TT5: Homo+Amphimedon
Time	Title	Reference	Year	Included in ranges	Reason for quarantine
960	An estimate of divergence time of Parazoa and Eumetazoa and that of Cephalochordata and Vertebrata by aldolase and triose phosphate isomerase clocks.	Nikoh et al.	1997	No	Pre-2000
653	Estimating metazoan divergence times with a molecular clock.	Peterson et al.	2004	No	Conflicts with Turner et al 2021
1355	A molecular timescale of eukaryote evolution and the rise of complex multicellular life.	Hedges et al.	2004	Yes
821.8	A molecular time-scale for eukaryote evolution recalibrated with the continuous microfossil record.	Berney et al.	2006	No	Conflicts with Turner
710	Fossils and phylogenies: integrating multiple lines of evidence to investigate the origin of early major metazoan lineages	Cartwright et al.	2007	No	Conflicts with Turner
705	The Ediacaran emergence of bilaterians: congruence between the genetic and the geological fossil records.	Peterson et al.	2008	No	Conflicts with Turner
1020	The TimeTree of Life	Hedges et al.	2009	Yes
710.7	Dating the molecular clock in fungi how close are we?	Berbee et al.	2010	No	Conflicts with Turner		avg	1088.33
701.9	Revisiting the age, evolutionary history and species level diversity of the genus Hydra (Cnidaria: Hydrozoa).	Schwentner et al.	2015	No	Conflicts with Turner		sd	195.888
756.6	Ancestral state reconstruction of ontogeny supports a bilaterian affinity for Dickinsonia.	Gold et al.	2015	No	Conflicts with Turner		se	74.0388
758.1	Uncertainty in the Timing of Origin of Animals and the Limits of Precision in Molecular Timescales.	dos Reis et al.	2015	No	Conflicts with Turner		ci+	1310.45
890	Possible poriferan body fossils in early neoproterozoic microbial reefs	Turner, E	2021				ci-	866.217
LUCA	Search: any Bacteria+Archaea
Time	Title	Reference	Year	Included in ranges	Reason for quarantine
2520	The age of the common ancestor of eukaryotes and prokaryotes: statistical inferences.	Gu et al.	1997	No	Does not cover LUCA
3784	Determining divergence times with a protein clock: update and reevaluation.	Feng et al.	1997	No	Pre-2000
1840	A genomic timescale for the origin of eukaryotes.	Hedges et al.	2001	No	Does not cover LUCA
3036	Estimation of divergence times from multiprotein sequences for a few mammalian species and several distantly related organisms.	Nei et al.	2001	No	Does not cover LUCA		avg	4250.2
4290	Estimated minimal divergence times of the major bacterial and archaeal phyla	Sheridan et al.	2003				sd	32.4152
4250	A major clade of prokaryotes with ancient adaptations to life on land.	Battistuzzi et al.	2009				se	18.7149
4200	The TimeTree of Life	Hedges et al.	2009	No	Not an original time (review paper)		ci-	4194.06
1983.6	Ancient origins determine global biogeography of hot and cold desert cyanobacteria.	Bahl et al.	2011	No	Does not cover LUCA		ci+	4306.34
4210.6	The Timetree of Prokaryotes: New Insights into Their Evolution and Speciation.	Marin et al.	2016
